# Supplementary material
Source: PubMed Central journal article supplement (PMC3719648)
Supplement: JCM.00308-13_zjm999092686so1.pdf [file JCM.00308-13_zjm999092686so1.pdf]

Supplemental Material. MIC distributions for azole and echinocandin antifungal agents tested against isolates of uncommon species of *Candida* and *Aspergillus* as well as non-*Candida* yeasts and non-*Aspergillus* moulds identified by molecular methods; SENTRY, 2010 to 2011

| Species<br>(no. tested)   | Antifungal<br>agent <sup>a</sup> | No. at MIC/MEC (µg/ml) |       |      |      |      |      |     |   |   |   |   |    |    |    |     |
|---------------------------|----------------------------------|------------------------|-------|------|------|------|------|-----|---|---|---|---|----|----|----|-----|
|                           |                                  | 0.007                  | 0.015 | 0.03 | 0.06 | 0.12 | 0.25 | 0.5 | 1 | 2 | 4 | 8 | 16 | 32 | 64 | 128 |
| <i>Candida species</i>    |                                  |                        |       |      |      |      |      |     |   |   |   |   |    |    |    |     |
| <i>C. bracarensis</i> (1) | ANF                              |                        |       | 1    |      |      |      |     |   |   |   |   |    |    |    |     |
|                           | CSF                              |                        |       | 1    |      |      |      |     |   |   |   |   |    |    |    |     |
|                           | MCF                              |                        |       | 1    |      |      |      |     |   |   |   |   |    |    |    |     |
|                           | FLC                              |                        |       |      |      |      |      |     |   | 1 |   |   |    |    |    |     |
|                           | ITR                              |                        |       |      |      |      |      |     | 1 |   |   |   |    |    |    |     |
|                           | PSC                              |                        |       |      |      |      |      |     | 1 |   |   |   |    |    |    |     |
|                           | VRC                              |                        |       |      | 1    |      |      |     |   |   |   |   |    |    |    |     |
|                           |                                  |                        |       |      |      |      |      |     |   |   |   |   |    |    |    |     |
| <i>C. catenulata</i> (2)  | ANF                              |                        |       |      |      | 2    |      |     |   |   |   |   |    |    |    |     |
|                           | CSF                              |                        |       |      |      |      |      | 2   |   |   |   |   |    |    |    |     |
|                           | MCF                              |                        |       |      | 1    | 1    |      |     |   |   |   |   |    |    |    |     |
|                           | FLC                              |                        |       |      |      |      |      |     | 1 |   |   | 1 |    |    |    |     |
|                           | ITR                              |                        |       |      |      |      | 2    |     |   |   |   |   |    |    |    |     |
|                           | PSC                              |                        |       |      |      |      | 2    |     |   |   |   |   |    |    |    |     |
|                           | VRC                              |                        |       |      |      | 1    |      |     |   |   |   |   |    |    |    |     |
|                           |                                  |                        |       |      |      |      |      |     |   |   |   |   |    |    |    |     |
| <i>C. fabianii</i> (1)    | ANF                              |                        | 1     |      |      |      |      |     |   |   |   |   |    |    |    |     |
|                           | CSF                              |                        |       | 1    |      |      |      |     |   |   |   |   |    |    |    |     |
|                           | MCF                              |                        |       | 1    |      |      |      |     |   |   |   |   |    |    |    |     |
|                           | FLC                              |                        |       |      |      |      |      |     |   | 1 |   |   |    |    |    |     |
|                           | ITR                              |                        |       |      |      |      |      |     | 1 |   |   |   |    |    |    |     |
|                           | PSC                              |                        |       |      |      |      |      |     |   | 1 |   |   |    |    |    |     |
|                           | VRC                              |                        |       |      | 1    |      |      |     |   |   |   |   |    |    |    |     |
|                           |                                  |                        |       |      |      |      |      |     |   |   |   |   |    |    |    |     |
| <i>C. haemulonii</i> (2)  | ANF                              |                        |       |      |      |      | 1    |     | 1 |   |   |   |    |    |    |     |
|                           | CSF                              |                        |       |      | 1    | 1    |      |     |   |   |   |   |    |    |    |     |
|                           | MCF                              |                        |       |      |      |      | 2    |     |   |   |   |   |    |    |    |     |
|                           | FLC                              |                        |       |      |      |      |      |     |   | 1 | 1 |   |    |    |    |     |
|                           | ITR                              |                        |       |      | 1    |      |      |     | 1 |   |   |   |    |    |    |     |
|                           | PSC                              |                        |       |      | 1    |      | 1    |     |   |   |   |   |    |    |    |     |
|                           | VRC                              |                        |       |      | 1    | 1    |      |     |   |   |   |   |    |    |    |     |
|                           |                                  |                        |       |      |      |      |      |     |   |   |   |   |    |    |    |     |
| <i>C. inconspicua</i> (2) | ANF                              |                        | 1     | 1    |      |      |      |     |   |   |   |   |    |    |    |     |
|                           | CSF                              |                        |       |      | 2    |      |      |     |   |   |   |   |    |    |    |     |
|                           | MCF                              |                        |       | 1    | 1    |      |      |     |   |   |   |   |    |    |    |     |
|                           | FLC                              |                        |       |      |      |      |      |     |   |   | 1 |   |    | 1  |    |     |
|                           | ITR                              |                        |       |      |      | 1    |      |     | 1 |   |   |   |    |    |    |     |
|                           | PSC                              |                        |       |      | 1    |      | 1    |     |   |   |   |   |    |    |    |     |
|                           | VRC                              |                        |       |      | 1    |      | 1    |     |   |   |   |   |    |    |    |     |
|                           |                                  |                        |       |      |      |      |      |     |   |   |   |   |    |    |    |     |
| <i>C. lipolytica</i> (4)  | ANF                              |                        |       |      |      |      | 3    | 1   |   |   |   |   |    |    |    |     |
|                           | CSF                              |                        |       |      |      | 2    | 2    |     |   |   |   |   |    |    |    |     |
|                           | MCF                              |                        |       |      |      |      |      | 3   | 1 |   |   |   |    |    |    |     |

| Species<br>(no. tested)            | Antifungal<br>agent <sup>a</sup> | No. at MIC/MEC (µg/ml) |       |      |      |      |      |     |   |   |   |   |    |    |    |
|------------------------------------|----------------------------------|------------------------|-------|------|------|------|------|-----|---|---|---|---|----|----|----|
|                                    |                                  | 0.007                  | 0.015 | 0.03 | 0.06 | 0.12 | 0.25 | 0.5 | 1 | 2 | 4 | 8 | 16 | 32 | 64 |
| <i>C. nivariensis</i> (2)          | FLC                              |                        |       |      |      |      | 1    |     | 2 |   |   | 1 |    |    |    |
|                                    | ITR                              |                        |       |      |      | 1    | 2    | 1   |   |   |   |   |    |    |    |
|                                    | PSC                              |                        |       |      |      | 1    | 2    | 1   |   |   |   |   |    |    |    |
|                                    | VRC                              | 1                      |       | 1    | 1    |      |      | 1   |   |   |   |   |    |    |    |
|                                    | ANF                              |                        |       |      | 1    |      |      |     |   |   |   |   |    | 1  |    |
|                                    | CSF                              |                        |       | 1    |      |      |      |     |   |   |   |   |    | 1  |    |
|                                    | MCF                              |                        | 1     |      |      |      |      |     |   |   |   |   |    | 1  |    |
| <i>C. norvegensis</i> (1)          | FLC                              |                        |       |      |      |      |      | 1   | 1 |   |   |   |    |    |    |
|                                    | ITR                              |                        |       |      | 1    |      |      | 1   |   |   |   |   |    |    |    |
|                                    | PSC                              |                        |       |      | 1    |      | 1    |     |   |   |   |   |    |    |    |
|                                    | VRC                              |                        | 1     |      | 1    |      |      |     |   |   |   |   |    |    |    |
|                                    | ANF                              |                        | 1     |      |      |      |      |     |   |   |   |   |    |    |    |
|                                    | CSF                              |                        |       | 1    |      |      |      |     |   |   |   |   |    |    |    |
|                                    | MCF                              |                        |       |      |      | 1    |      |     |   |   |   |   |    |    |    |
| <i>C. pararugosa</i> (2)           | FLC                              |                        |       |      |      |      |      | 1   |   |   | 2 |   |    |    |    |
|                                    | ITR                              |                        |       |      | 1    |      | 1    |     |   |   |   |   |    |    |    |
|                                    | PSC                              |                        |       |      | 1    | 1    | 1    |     |   |   |   |   |    |    |    |
|                                    | VRC                              | 1                      |       |      |      |      | 2    |     |   |   |   |   |    |    |    |
|                                    | ANF                              |                        |       |      |      | 1    | 1    |     |   |   |   |   |    |    |    |
|                                    | CSF                              |                        |       |      | 1    | 1    |      |     |   |   |   |   |    |    |    |
|                                    | MCF                              |                        |       |      |      | 2    |      |     |   |   |   |   |    |    |    |
| <i>C. pelliculosa</i> (1)          | FLC                              |                        |       |      |      |      |      |     |   |   | 1 |   |    |    |    |
|                                    | ITR                              |                        |       |      |      | 1    |      |     |   |   |   |   |    |    |    |
|                                    | PSC                              |                        |       |      |      | 1    | 1    |     |   |   |   |   |    |    |    |
|                                    | VRC                              |                        |       |      |      | 2    |      |     |   |   |   |   |    |    |    |
|                                    | ANF                              | 1                      |       |      |      |      |      |     |   |   |   |   |    |    |    |
|                                    | CSF                              |                        | 1     |      |      |      |      |     |   |   |   |   |    |    |    |
|                                    | MCF                              |                        |       | 1    |      |      |      |     |   |   |   |   |    |    |    |
| <i>Aureobasidium pullulans</i> (1) | FLC                              |                        |       |      |      |      |      |     |   | 1 |   |   |    |    |    |
|                                    | ITR                              |                        |       |      | 1    |      |      |     |   |   |   |   | 1  |    |    |
|                                    | PSC                              |                        |       |      |      | 1    |      |     |   |   |   |   |    |    |    |
|                                    | VRC                              |                        |       |      | 1    |      |      |     |   |   |   |   |    |    |    |
|                                    | ANF                              |                        |       |      | 1    |      |      |     |   |   |   |   |    |    |    |
|                                    | CSF                              |                        |       |      |      |      | 1    |     | 1 |   |   |   |    |    |    |
|                                    | MCF                              |                        |       |      |      |      |      |     | 1 |   |   |   |    |    |    |
| <i>Debaryomyces fabryi</i> (1)     | FLC                              |                        |       |      |      |      |      |     |   |   |   |   |    |    |    |
|                                    | ITR                              |                        |       |      | 1    |      |      |     |   |   |   |   |    |    |    |
|                                    | PSC                              |                        |       | 1    |      |      |      |     |   |   |   |   |    |    |    |

| Species<br>(no. tested)                  | Antifungal<br>agent <sup>a</sup> | No. at MIC/MEC (µg/ml) |       |      |      |      |      |     |   |   |   |   |    |    |    |     |  |
|------------------------------------------|----------------------------------|------------------------|-------|------|------|------|------|-----|---|---|---|---|----|----|----|-----|--|
|                                          |                                  | 0.007                  | 0.015 | 0.03 | 0.06 | 0.12 | 0.25 | 0.5 | 1 | 2 | 4 | 8 | 16 | 32 | 64 | 128 |  |
| <i>Dipodascus capitatus</i> (3)          | FLC                              |                        |       |      |      |      |      | 1   |   |   |   |   |    |    |    |     |  |
|                                          | ITR                              |                        |       |      |      |      | 1    |     |   |   |   |   |    |    |    |     |  |
|                                          | PSC                              |                        |       |      |      | 1    |      |     |   |   |   |   |    |    |    |     |  |
|                                          | VRC                              |                        | 1     |      |      |      |      |     |   |   |   |   |    |    |    |     |  |
|                                          | ANF                              |                        |       |      |      |      |      |     |   | 1 | 2 |   |    |    |    |     |  |
| <i>Lodderomyces elongisporus</i> (2)     | CSF                              |                        |       |      |      |      |      |     |   |   |   |   | 3  |    |    |     |  |
|                                          | MCF                              |                        |       |      |      |      |      |     | 1 |   |   |   | 2  |    |    |     |  |
|                                          | FLC                              |                        |       |      |      |      |      |     |   | 2 | 1 |   |    |    |    |     |  |
|                                          | ITR                              |                        |       |      |      |      |      | 2   |   | 1 |   |   |    |    |    |     |  |
|                                          | PSC                              |                        |       |      |      |      |      | 2   |   | 1 |   |   |    |    |    |     |  |
|                                          | VRC                              |                        |       |      |      |      | 1    | 1   | 1 |   |   |   |    |    |    |     |  |
|                                          | ANF                              |                        |       | 2    |      |      |      |     |   |   |   |   |    |    |    |     |  |
| <i>Trichosporon mycotoxinivorans</i> (1) | CSF                              |                        | 1     | 1    |      |      |      |     |   |   |   |   |    |    |    | 1   |  |
|                                          | MCF                              |                        |       | 2    |      |      |      |     |   |   |   |   |    |    |    | 1   |  |
|                                          | FLC                              |                        |       |      |      |      |      |     |   |   | 1 |   |    |    |    |     |  |
|                                          | ITR                              |                        |       |      |      | 1    | 1    |     |   |   |   |   |    |    |    |     |  |
|                                          | PSC                              |                        |       |      |      | 2    |      |     |   |   |   |   |    |    |    |     |  |
|                                          | VRC                              | 2                      |       |      |      |      |      |     |   |   |   |   |    |    |    |     |  |
|                                          | ANF                              |                        |       |      |      |      |      |     |   |   |   |   |    |    |    |     |  |
| <i>Aspergillus species</i>               | CSF                              |                        |       |      |      |      |      |     |   |   |   |   |    |    |    | 1   |  |
|                                          | MCF                              |                        |       |      |      |      |      |     |   |   |   |   |    |    |    | 1   |  |
|                                          | FLC                              |                        |       |      |      |      |      |     |   |   | 1 |   |    |    |    |     |  |
|                                          | ITR                              |                        |       |      |      |      |      |     |   | 1 |   |   |    |    |    |     |  |
|                                          | PSC                              |                        |       |      |      |      |      | 1   |   |   |   |   |    |    |    |     |  |
|                                          | VRC                              |                        |       |      |      |      | 1    |     |   |   |   |   |    |    |    |     |  |
|                                          | ANF                              |                        |       |      |      |      |      |     |   |   |   |   |    |    |    |     |  |
| <i>A. alabamensis</i> (2)                | CSF                              | 1                      | 1     |      |      |      |      |     |   |   |   |   |    |    |    |     |  |
|                                          | MCF                              | 2                      |       |      |      |      |      |     |   |   |   |   |    |    |    |     |  |
|                                          | ITR                              |                        |       |      |      |      |      |     | 2 |   |   |   |    |    |    |     |  |
|                                          | PSC                              |                        |       |      |      |      |      | 1   | 1 |   |   |   |    |    |    |     |  |
|                                          | VRC                              |                        |       |      |      |      |      | 2   |   |   |   |   |    |    |    |     |  |
| <i>A. foetidus</i> (1)                   | ANF                              |                        | 1     |      |      |      |      |     |   |   |   |   |    |    |    |     |  |
|                                          | CSF                              |                        |       |      | 1    |      |      |     |   |   |   |   |    |    |    |     |  |
|                                          | MCF                              |                        |       |      | 1    |      |      |     |   |   |   |   |    |    |    |     |  |
|                                          | ITR                              |                        |       |      |      |      |      |     |   | 1 |   |   |    |    |    |     |  |
|                                          | PSC                              |                        |       |      |      |      |      |     |   | 1 |   |   |    |    |    |     |  |
| <i>A. nidulans</i> (2)                   | VRC                              |                        |       |      |      |      |      |     |   | 1 |   |   |    |    |    |     |  |
|                                          | ANF                              |                        |       | 1    | 1    |      |      |     |   |   |   |   |    |    |    |     |  |
|                                          | CSF                              |                        |       |      | 2    |      |      |     |   |   |   |   |    |    |    |     |  |
|                                          | MCF                              | 2                      |       |      |      |      |      |     |   |   |   |   |    |    |    |     |  |
|                                          | ITR                              |                        |       |      |      |      |      |     |   | 2 |   |   |    |    |    |     |  |
| PSC                                      |                                  |                        |       |      |      |      | 2    |     |   |   |   |   |    |    |    |     |  |

| Species<br>(no. tested)                   | Antifungal<br>agent <sup>a</sup> | No. at MIC/MEC (µg/ml) |       |      |      |      |      |     |   |   |   |   |    |    |    |     |  |
|-------------------------------------------|----------------------------------|------------------------|-------|------|------|------|------|-----|---|---|---|---|----|----|----|-----|--|
|                                           |                                  | 0.007                  | 0.015 | 0.03 | 0.06 | 0.12 | 0.25 | 0.5 | 1 | 2 | 4 | 8 | 16 | 32 | 64 | 128 |  |
| <i>A. sydowii</i> (2)                     | VRC                              |                        |       |      |      | 2    |      |     |   |   |   |   |    |    |    |     |  |
|                                           | ANF                              |                        |       | 2    |      |      |      |     |   |   |   |   |    |    |    |     |  |
|                                           | CSF                              |                        |       | 2    |      |      |      |     |   |   |   |   |    |    |    |     |  |
|                                           | MCF                              |                        | 1     | 1    |      |      |      |     |   |   |   |   |    |    |    |     |  |
|                                           | ITR                              |                        |       |      |      |      |      |     | 1 | 1 |   |   |    |    |    |     |  |
|                                           | PSC                              |                        |       |      |      |      | 1    |     | 1 |   |   |   |    |    |    |     |  |
|                                           | VRC                              |                        |       |      |      |      |      |     | 1 | 1 |   |   |    |    |    |     |  |
| <i>A. ustus</i> SC (1)                    | ANF                              | 1                      |       |      |      |      |      |     |   |   |   |   |    |    |    |     |  |
|                                           | CSF                              | 1                      |       |      |      |      |      |     |   |   |   |   |    |    |    |     |  |
|                                           | MCF                              | 1                      |       |      |      |      |      |     |   |   |   |   |    |    |    |     |  |
|                                           | ITR                              |                        |       |      |      |      |      |     | 1 |   |   |   |    |    |    |     |  |
|                                           | PSC                              |                        |       |      |      |      |      | 1   |   |   |   |   |    |    |    |     |  |
|                                           | VRC                              |                        |       |      |      |      |      | 1   |   |   |   |   |    |    |    |     |  |
| <u>non-Aspergillus</u>                    |                                  |                        |       |      |      |      |      |     |   |   |   |   |    |    |    |     |  |
| <i>Accremonium strictum</i> genogroup (1) | ANF                              |                        |       |      |      |      |      |     |   |   |   |   | 1  |    |    |     |  |
|                                           | CSF                              |                        |       |      |      |      |      |     |   |   |   |   | 1  |    |    |     |  |
|                                           | MCF                              |                        |       |      |      |      |      |     |   |   |   |   | 1  |    |    |     |  |
|                                           | ITR                              |                        |       |      |      |      |      |     |   |   |   | 1 |    |    |    |     |  |
|                                           | PSC                              |                        |       |      |      |      |      |     |   |   | 1 |   |    |    |    |     |  |
|                                           | VRC                              |                        |       |      |      |      |      |     |   | 1 |   |   |    |    |    |     |  |
| <i>Coprinellus radians</i> (1)            | ANF                              |                        |       |      |      |      |      |     |   |   | 1 |   |    |    |    |     |  |
|                                           | CSF                              |                        |       |      |      |      |      |     |   |   | 1 |   |    |    |    |     |  |
|                                           | MCF                              |                        |       |      |      |      |      |     |   |   | 1 |   |    |    |    |     |  |
|                                           | ITR                              |                        |       |      |      |      |      |     |   | 1 |   |   |    |    |    |     |  |
|                                           | PSC                              |                        |       |      |      |      | 1    |     |   |   |   |   |    |    |    |     |  |
|                                           | VRC                              |                        |       |      |      |      |      |     |   |   |   |   |    |    |    |     |  |
|                                           | VRC                              |                        |       |      |      | 1    |      |     |   |   |   |   |    |    |    |     |  |
| <i>Fusarium solani</i> SC (3)             | ANF                              |                        |       |      |      |      |      |     |   |   |   |   |    |    | 3  |     |  |
|                                           | CSF                              |                        |       |      |      |      |      |     |   |   |   |   |    |    | 3  |     |  |
|                                           | MCF                              |                        |       |      |      |      |      |     |   |   |   |   |    |    | 3  |     |  |
|                                           | ITR                              |                        |       |      |      |      |      |     |   |   |   |   | 3  |    |    |     |  |
|                                           | PSC                              |                        |       |      |      |      |      |     |   |   | 2 | 2 | 1  |    |    |     |  |
|                                           | VRC                              |                        |       |      |      |      |      |     |   |   | 2 |   | 1  |    |    |     |  |
| <i>Lichtheimia corymbifera</i> (1)        | ANF                              |                        |       |      |      |      |      |     |   |   |   |   |    |    | 1  |     |  |
|                                           | CSF                              |                        |       |      |      |      |      |     |   |   |   |   |    |    | 1  |     |  |
|                                           | MCF                              |                        |       |      |      |      |      |     |   |   |   |   |    |    | 1  |     |  |
|                                           | ITR                              |                        |       |      |      |      |      |     |   | 1 |   |   |    |    |    |     |  |
|                                           | PSC                              |                        |       |      |      |      |      |     | 1 |   |   |   |    |    |    |     |  |
|                                           | VRC                              |                        |       |      |      |      |      |     |   |   |   |   | 1  |    |    |     |  |
| <i>Paecilomyces variotii</i> (2)          | ANF                              |                        | 1     | 1    |      |      |      |     |   |   |   |   |    |    |    |     |  |
|                                           | CSF                              |                        |       | 1    |      |      |      |     |   |   |   |   |    |    |    |     |  |
|                                           | MCF                              | 1                      | 1     |      |      |      |      |     |   |   | 1 |   |    |    |    |     |  |
|                                           | ITR                              |                        |       |      |      |      |      |     | 2 |   |   |   |    |    |    |     |  |
|                                           | PSC                              |                        |       |      |      |      |      | 2   |   |   |   |   |    |    |    |     |  |

| Species<br>(no. tested)                                | Antifungal<br>agent <sup>a</sup>                | No. at MIC/MEC (µg/ml) |       |      |      |      |      |     |   |   |   |   |    |    |    |     |
|--------------------------------------------------------|-------------------------------------------------|------------------------|-------|------|------|------|------|-----|---|---|---|---|----|----|----|-----|
|                                                        |                                                 | 0.007                  | 0.015 | 0.03 | 0.06 | 0.12 | 0.25 | 0.5 | 1 | 2 | 4 | 8 | 16 | 32 | 64 | 128 |
| <i>Penicillium roqueforti</i> group (1)                | VRC                                             |                        |       |      |      |      |      |     |   | 1 |   | 1 |    |    |    |     |
|                                                        | ANF                                             |                        |       |      | 1    |      |      |     |   |   |   |   |    |    |    |     |
|                                                        | CSF                                             |                        |       |      | 1    |      |      |     |   |   |   |   |    |    |    |     |
|                                                        | MCF                                             |                        |       | 1    |      |      |      |     |   |   |   |   |    |    |    |     |
|                                                        | ITR                                             |                        |       |      |      |      |      |     | 1 |   |   |   |    |    |    |     |
|                                                        | PSC                                             |                        |       |      |      |      | 1    |     |   |   |   |   |    |    |    |     |
|                                                        | VRC                                             |                        |       |      |      |      |      |     | 1 |   |   |   |    |    |    |     |
| <i>Penicillium</i> subgenus <i>aspergilloides</i> (3)  | ANF                                             | 2                      | 1     |      |      |      |      |     |   |   |   |   |    |    |    |     |
|                                                        | CSF                                             |                        | 3     |      |      |      |      |     |   |   |   |   |    |    |    |     |
|                                                        | MCF                                             | 1                      | 2     |      |      |      |      |     |   |   |   |   |    |    |    |     |
|                                                        | ITR                                             |                        |       |      |      |      | 1    | 2   |   |   |   |   |    |    |    |     |
|                                                        | PSC                                             |                        |       |      |      | 1    | 2    |     |   |   |   |   |    |    |    |     |
|                                                        | VRC                                             |                        |       |      |      |      |      | 3   |   |   |   |   |    |    |    |     |
|                                                        | <i>Penicillium</i> subgenus <i>furcatum</i> (1) | ANF                    |       |      |      | 1    |      |     |   |   |   |   |    |    |    |     |
| CSF                                                    |                                                 |                        |       |      |      |      |      |     | 1 |   |   |   |    |    |    |     |
| MCF                                                    |                                                 |                        |       |      | 1    |      |      |     |   |   |   |   |    |    |    |     |
| ITR                                                    |                                                 |                        |       |      |      |      |      |     | 1 |   |   |   |    |    |    |     |
| PSC                                                    |                                                 |                        |       |      |      |      | 1    |     |   |   |   |   |    |    |    |     |
| VRC                                                    |                                                 |                        |       |      |      |      |      | 1   |   |   |   |   |    |    |    |     |
| <i>Penicillium</i> subgenus <i>terverticillata</i> (2) |                                                 | ANF                    | 2     |      |      |      |      |     |   |   |   |   |    |    |    |     |
|                                                        | CSF                                             |                        | 2     |      |      |      |      |     |   |   |   |   |    |    |    |     |
|                                                        | MCF                                             | 2                      |       |      |      |      |      |     |   |   |   |   |    |    |    |     |
|                                                        | ITR                                             |                        |       |      |      |      |      |     | 2 |   |   |   |    |    |    |     |
|                                                        | PSC                                             |                        |       |      |      |      | 2    |     |   |   |   |   |    |    |    |     |
|                                                        | VRC                                             |                        |       |      |      |      |      | 2   |   |   |   |   |    |    |    |     |
|                                                        | <i>Penicillium variable</i> (1)                 | ANF                    | 1     |      |      |      |      |     |   |   |   |   |    |    |    |     |
| CSF                                                    |                                                 | 1                      |       |      |      |      |      |     |   |   |   |   |    |    |    |     |
| MCF                                                    |                                                 | 1                      |       |      |      |      |      |     |   |   |   |   |    |    |    |     |
| ITR                                                    |                                                 |                        |       |      |      |      |      |     | 1 |   |   |   |    |    |    |     |
| PSC                                                    |                                                 |                        |       |      |      |      |      |     | 1 |   |   |   |    |    |    |     |
| VRC                                                    |                                                 |                        |       |      |      |      |      |     |   | 1 |   |   |    |    |    |     |
| <i>Phialemonium curvatum</i> (1)                       |                                                 | ANF                    |       |      |      |      |      |     |   |   |   |   |    |    |    |     |
|                                                        | CSF                                             |                        |       |      |      |      |      |     |   |   |   |   |    |    |    | 1   |
|                                                        | MCF                                             |                        |       |      |      |      |      |     |   |   |   |   |    |    |    | 1   |
|                                                        | ITR                                             |                        |       |      |      |      |      |     |   |   | 1 |   |    |    |    |     |
|                                                        | PSC                                             |                        |       |      |      |      |      |     | 1 |   |   |   |    |    |    |     |
|                                                        | VRC                                             |                        |       |      |      |      |      |     | 1 |   |   |   |    |    |    |     |
|                                                        | <i>Rhizomucor pusillus</i> (1)                  | ANF                    |       |      |      |      |      |     |   |   |   | 1 |    |    |    |     |
| CSF                                                    |                                                 |                        |       |      |      |      |      |     |   |   |   |   |    |    | 1  |     |
| MCF                                                    |                                                 |                        |       |      |      |      |      |     |   |   |   |   |    |    | 1  |     |
| ITR                                                    |                                                 |                        |       |      |      |      |      |     |   |   |   |   |    |    |    | 1   |
| PSC                                                    |                                                 |                        |       |      |      |      |      |     |   |   |   |   |    |    |    | 1   |
| VRC                                                    |                                                 |                        |       |      |      |      |      |     |   |   |   |   |    |    |    | 1   |

| Species<br>(no. tested)               | Antifungal<br>agent <sup>a</sup> | No. at MIC/MEC (µg/ml) |       |      |      |      |      |     |   |   |   |   |    |    |    |     |   |
|---------------------------------------|----------------------------------|------------------------|-------|------|------|------|------|-----|---|---|---|---|----|----|----|-----|---|
|                                       |                                  | 0.007                  | 0.015 | 0.03 | 0.06 | 0.12 | 0.25 | 0.5 | 1 | 2 | 4 | 8 | 16 | 32 | 64 | 128 |   |
| <i>Rhizopus microsporus</i> group (1) | VRC                              |                        |       |      |      |      |      |     |   |   |   | 1 |    |    |    |     |   |
|                                       | ANF                              |                        |       |      |      |      |      |     |   |   |   |   | 1  |    |    |     |   |
|                                       | CSF                              |                        |       |      |      |      |      |     |   |   |   |   | 1  |    |    |     |   |
|                                       | MCF                              |                        |       |      |      |      |      |     |   |   |   |   | 1  |    |    |     |   |
|                                       | ITR                              |                        |       |      |      |      |      |     |   | 1 |   |   |    |    |    |     |   |
|                                       | PSC                              |                        |       |      |      |      |      |     | 1 |   |   |   |    |    |    |     |   |
|                                       | VRC                              |                        |       |      |      |      |      |     |   |   |   |   | 1  |    |    |     |   |
| <i>Rhizopus oryzae</i> (1)            | ANF                              |                        |       |      |      |      |      |     |   |   |   |   | 1  |    |    |     |   |
|                                       | CSF                              |                        |       |      |      |      |      |     |   |   |   |   | 1  |    |    |     |   |
|                                       | MCF                              |                        |       |      |      |      |      |     |   |   |   |   | 1  |    |    |     |   |
|                                       | ITR                              |                        |       |      |      |      |      |     | 1 |   |   |   |    |    |    |     |   |
|                                       | PSC                              |                        |       |      |      |      | 1    |     |   |   |   |   |    |    |    |     |   |
|                                       | VRC                              |                        |       |      |      |      |      |     |   |   |   |   | 1  |    |    |     |   |
|                                       | <i>Sarocladium kiliense</i> (2)  | ANF                    | 1     | 1    |      |      |      |     |   |   |   |   |    |    |    |     |   |
| CSF                                   |                                  |                        | 2     |      |      |      |      |     |   |   |   |   |    |    |    |     |   |
| MCF                                   |                                  | 1                      |       | 1    |      |      |      |     |   |   |   |   |    |    |    |     |   |
| ITR                                   |                                  |                        |       |      |      |      |      |     |   |   |   | 2 |    |    |    |     |   |
| PSC                                   |                                  |                        |       |      |      |      |      |     |   |   | 2 |   |    |    |    |     |   |
| VRC                                   |                                  |                        |       |      |      |      |      |     |   | 1 | 1 |   |    |    |    |     |   |
| <i>Scedosporium apiospermum</i> (4)   |                                  | ANF                    |       |      |      |      |      |     |   |   | 1 | 2 | 1  |    |    |     |   |
|                                       | CSF                              |                        |       |      |      |      | 1    |     |   | 2 |   |   | 1  |    |    |     |   |
|                                       | MCF                              |                        |       |      |      |      | 1    | 2   |   |   |   |   | 1  |    |    |     |   |
|                                       | ITR                              |                        |       |      |      |      |      | 1   | 1 | 1 | 1 |   |    |    |    |     |   |
|                                       | PSC                              |                        |       |      |      |      |      | 1   | 1 | 1 | 2 |   |    |    |    |     |   |
|                                       | VRC                              |                        |       |      |      | 1    | 1    | 1   | 1 |   |   |   |    |    |    |     |   |
|                                       | <i>Alternaria</i> spp. (2)       | ANF                    |       |      |      | 1    | 1    |     |   |   |   |   |    |    |    |     |   |
| CSF                                   |                                  |                        |       |      | 1    |      | 1    |     |   |   |   |   |    |    |    |     |   |
| MCF                                   |                                  |                        |       |      |      | 2    |      |     |   |   |   |   |    |    |    |     |   |
| ITR                                   |                                  |                        |       |      |      |      |      |     | 2 |   |   |   |    |    |    |     |   |
| PSC                                   |                                  |                        |       |      |      |      |      |     | 2 |   |   |   |    |    |    |     |   |
| VRC                                   |                                  |                        |       |      |      |      |      |     | 1 | 1 |   |   |    |    |    |     |   |
| <i>Curvularia</i> sp. (1)             |                                  | ANF                    |       |      |      |      |      |     |   | 1 |   |   |    |    |    |     |   |
|                                       | CSF                              |                        |       |      |      |      | 1    |     |   |   |   |   |    |    |    |     |   |
|                                       | MCF                              |                        |       |      |      | 1    |      |     |   |   |   |   |    |    |    |     |   |
|                                       | ITR                              |                        |       |      |      |      | 1    |     |   |   |   |   |    |    |    |     |   |
|                                       | PSC                              |                        |       |      |      | 1    |      |     |   |   |   |   |    |    |    |     |   |
|                                       | VRC                              |                        |       |      |      | 1    |      |     |   |   |   |   |    |    |    |     |   |
|                                       | <i>Fusarium</i> sp. (1)          | ANF                    |       |      |      |      |      |     |   |   |   |   |    |    |    |     | 1 |
| CSF                                   |                                  |                        |       |      |      |      |      |     |   |   |   |   |    |    |    | 1   |   |
| MCF                                   |                                  |                        |       |      |      |      |      |     |   |   |   |   |    |    |    | 1   |   |
| ITR                                   |                                  |                        |       |      |      |      |      |     |   |   |   | 1 |    |    |    |     |   |
| PSC                                   |                                  |                        |       |      |      |      |      |     |   |   | 1 |   |    |    |    |     |   |
| VRC                                   |                                  |                        |       |      |      |      |      |     |   |   | 1 |   |    |    |    |     |   |

| Species<br>(no. tested)           | Antifungal<br>agent <sup>a</sup> | No. at MIC/MEC (µg/ml) |       |      |      |      |      |     |   |   |   |   |    |    |    |     |
|-----------------------------------|----------------------------------|------------------------|-------|------|------|------|------|-----|---|---|---|---|----|----|----|-----|
|                                   |                                  | 0.007                  | 0.015 | 0.03 | 0.06 | 0.12 | 0.25 | 0.5 | 1 | 2 | 4 | 8 | 16 | 32 | 64 | 128 |
| <i>Penicillium</i> sp. (1)        | ANF                              |                        |       | 1    |      |      |      |     |   |   |   |   |    |    |    |     |
|                                   | CSF                              |                        |       |      | 1    |      |      |     |   |   |   |   |    |    |    |     |
|                                   | MCF                              |                        |       |      | 1    |      |      |     |   |   |   |   |    |    |    |     |
|                                   | ITR                              |                        |       |      |      |      |      |     | 1 |   |   |   |    |    |    |     |
|                                   | PSC                              |                        |       |      |      |      |      |     | 1 |   |   |   |    |    |    |     |
|                                   | VRC                              |                        |       |      |      |      |      |     |   |   | 1 |   |    |    |    |     |
| <i>Trichoderma</i> sp. (1)        | ANF                              |                        |       |      |      | 1    |      |     |   |   |   |   |    |    |    |     |
|                                   | CSF                              |                        |       |      | 1    |      |      |     |   |   |   |   |    |    |    |     |
|                                   | MCF                              | 1                      |       |      |      |      |      |     |   |   |   |   |    |    |    |     |
|                                   | ITR                              |                        |       |      |      |      |      |     |   |   | 1 |   |    |    |    |     |
|                                   | PSC                              |                        |       |      |      |      |      |     |   |   | 1 |   |    |    |    |     |
|                                   | VRC                              |                        |       |      |      |      |      |     | 1 |   |   |   |    |    |    |     |
| <i>Exophiala dermatitidis</i> (1) | ANF                              |                        |       |      |      |      |      |     |   |   | 1 |   |    |    |    |     |
|                                   | CSF                              |                        |       |      |      |      |      |     |   |   |   | 1 |    |    |    |     |
|                                   | MCF                              |                        |       |      |      |      |      |     |   |   |   | 1 |    |    |    |     |
|                                   | ITR                              |                        |       |      |      |      |      |     | 1 |   |   |   |    |    |    |     |
|                                   | PSC                              |                        |       |      |      |      |      |     |   | 1 |   |   |    |    |    |     |
|                                   | VRC                              |                        |       |      |      |      |      |     |   | 1 |   |   |    |    |    |     |

a. ANF, anidulafungin, MCF, micafungin, CSF, caspofungin, ITR, itraconazole, PSC, posaconazole, VRC, voriconazole.
